# Supplementary material for: Blood lipids influence DNA methylation in circulating cells
Source: PubMed Central journal article supplement (PMC4922056; doi:10.1186/s13059-016-1000-6), 2016-06-27
Supplement: 13059_2016_1000_MOESM2_ESM.pdf [file 13059_2016_1000_MOESM2_ESM.pdf]

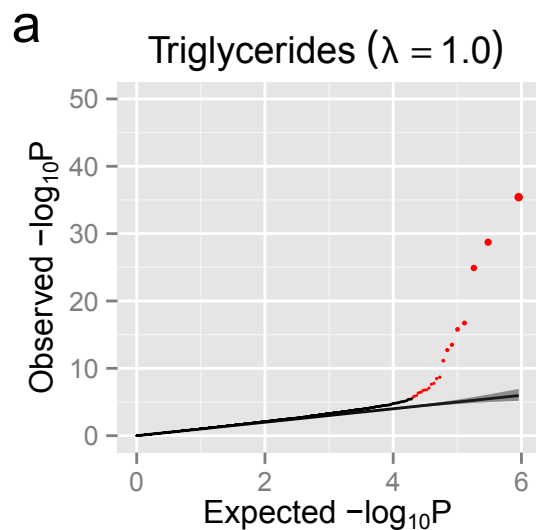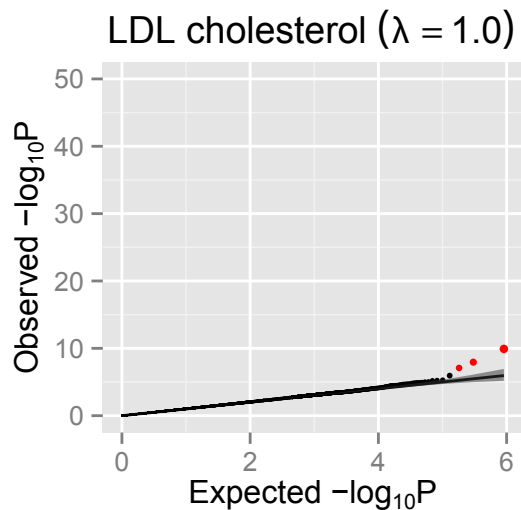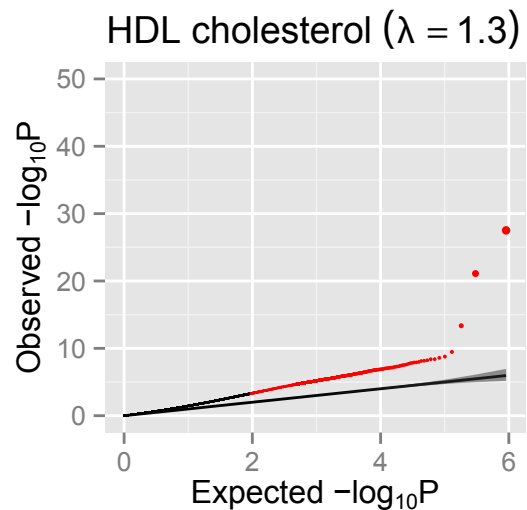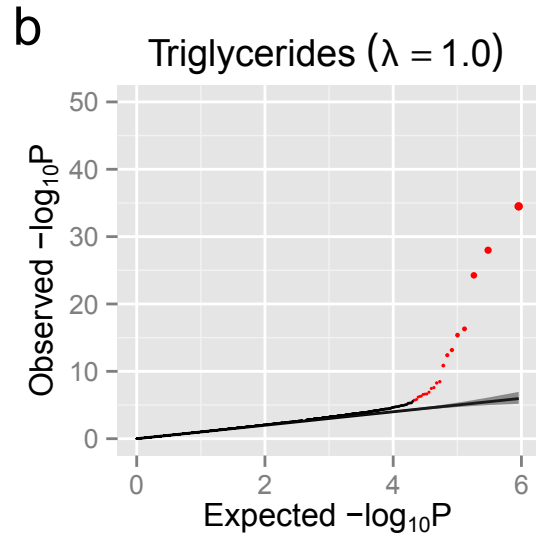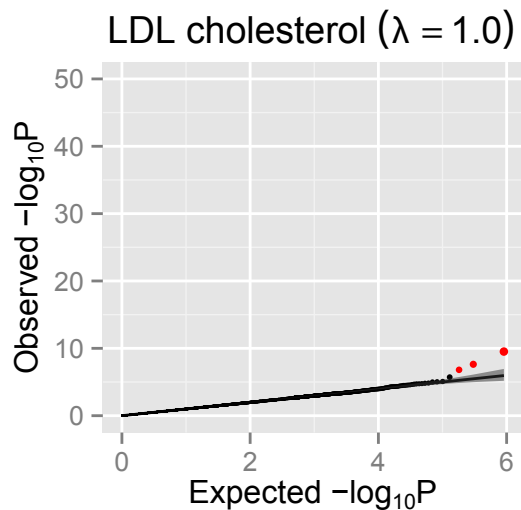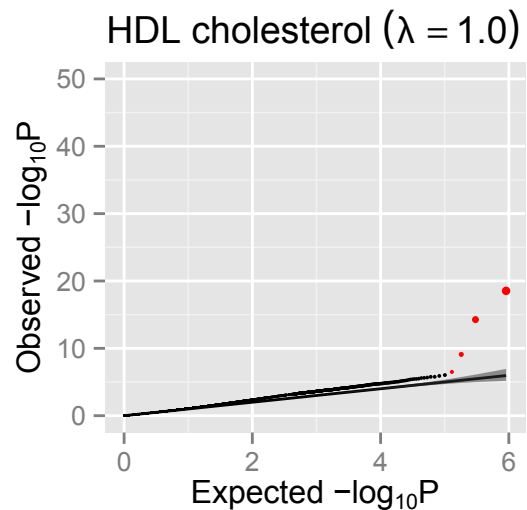

FDR < 0.05

● FALSE

● TRUE
