# Supplementary material for: Blood lipids influence DNA methylation in circulating cells
Source: PubMed Central journal article supplement (PMC4922056; doi:10.1186/s13059-016-1000-6), 2016-06-27

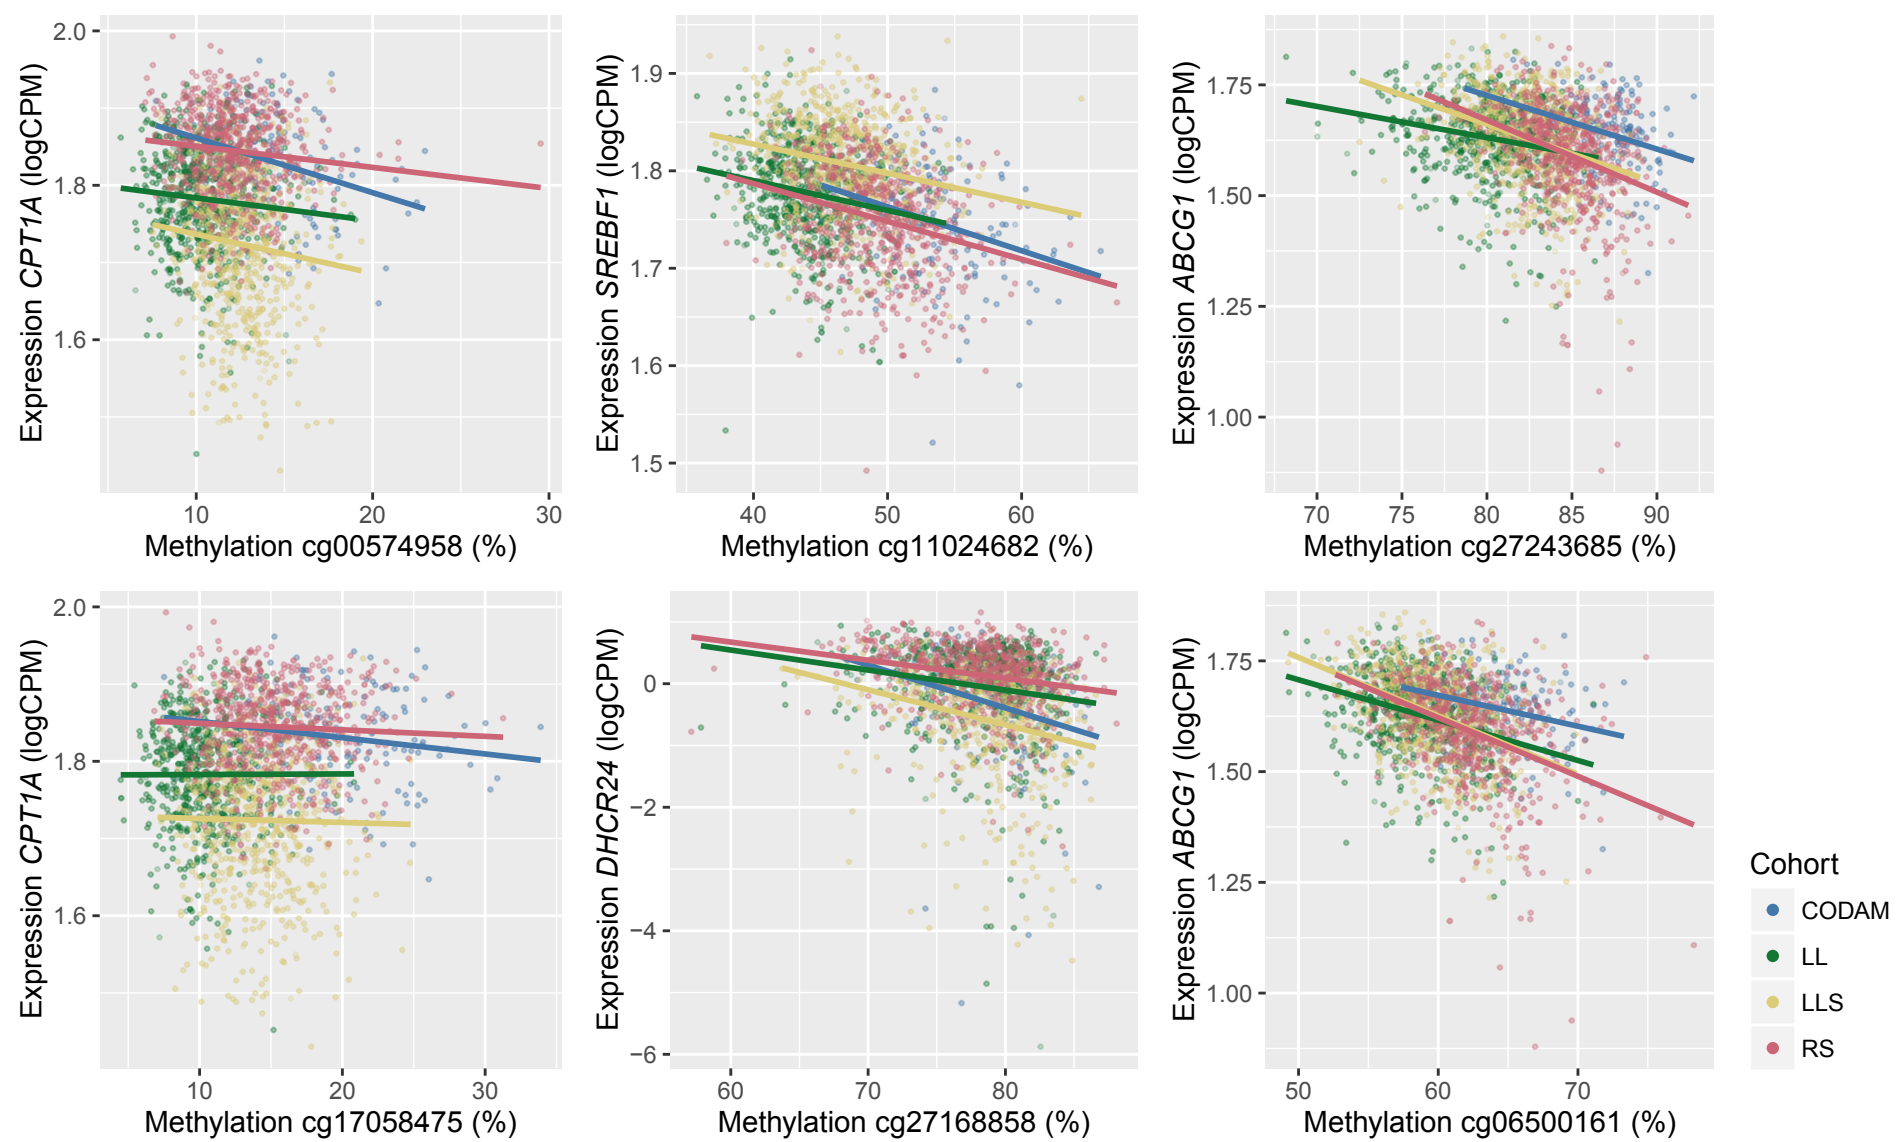

Supplement: 13059_2016_1000_MOESM14_ESM.pdf [file 13059_2016_1000_MOESM14_ESM.pdf]
