# Supplementary material for: Blood lipids influence DNA methylation in circulating cells
Source: Genome Biol. 2016 Jun 27;17:138. doi: 10.1186/s13059-016-1000-6 (PMC4922056; doi:10.1186/s13059-016-1000-6)
Supplement: Additional file 7: — The HDL-C PS is nominally associated with confounder neutrophil counts. (CSV 202 bytes) [file 13059_2016_1000_MOESM7_ESM.csv]

	TG PS	LDL-C PS	HDL-C PS
	P-value	P-value	P-value
Gender	0.82	0.67	0.72
Age	0.99	0.97	0.97
Monocytes	0.68	0.21	0.84
Lymphocytes	0.35	0.85	0.3
Neutrophils	0.34	0.96	1.8 x 10-2
BMI	0.81	0.56	0.24
